# Supplementary material for: Spatial Extent of Future Changes in the Hydrologic CycleComponents in Ganga Basin using Ranked CORDEX RCMs
Source: Copernicus journal article supplement (doi:10.5194/hess-2017-189), 2017-05-29
Supplement: Supplementary file 1 [file hess-2017-189-supplement.pdf]

Supporting Information for

# **Spatial Extent of Future Changes in the Hydrologic Cycle Components in Ganga Basin using Ranked CORDEX RCMs**

Jatin Anand<sup>1</sup>, Manjula Devak<sup>1</sup>, Ashvani Kumar Gosain<sup>1</sup>, Rakesh Khosa<sup>1</sup> and Chandrika Thulaseedharan Dhanya<sup>1</sup>

5 <sup>1</sup> Department of Civil Engineering, Indian Institute of Technology Delhi, New Delhi-110016, India.

*Correspondence to:* Dr. Chandrika Thulaseedharan Dhanya (dhanya@civil.iitd.ac.in)

## **Contents of this file**

Fig. S1, Fig. S2 and Fig. S3

10

15

20

25

## Introduction

This supporting information provides the figures supporting the analysis presented in main article.

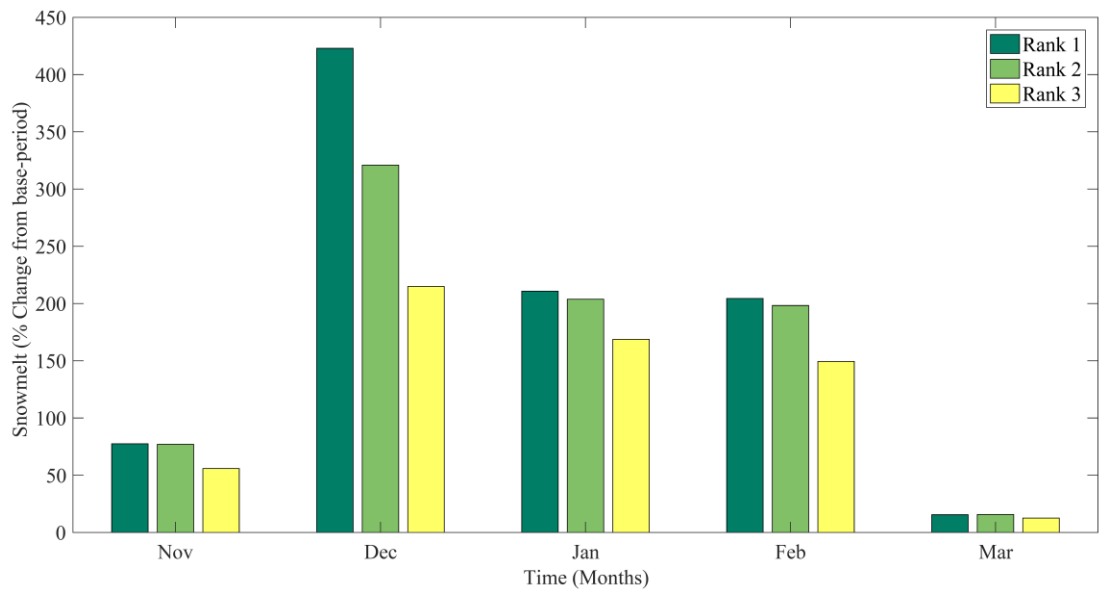

5

Fig. 1. Percentage change in simulated projected changes in average monthly snowmelt at Rishikesh for ranked RCMs for the period 20121-2100.

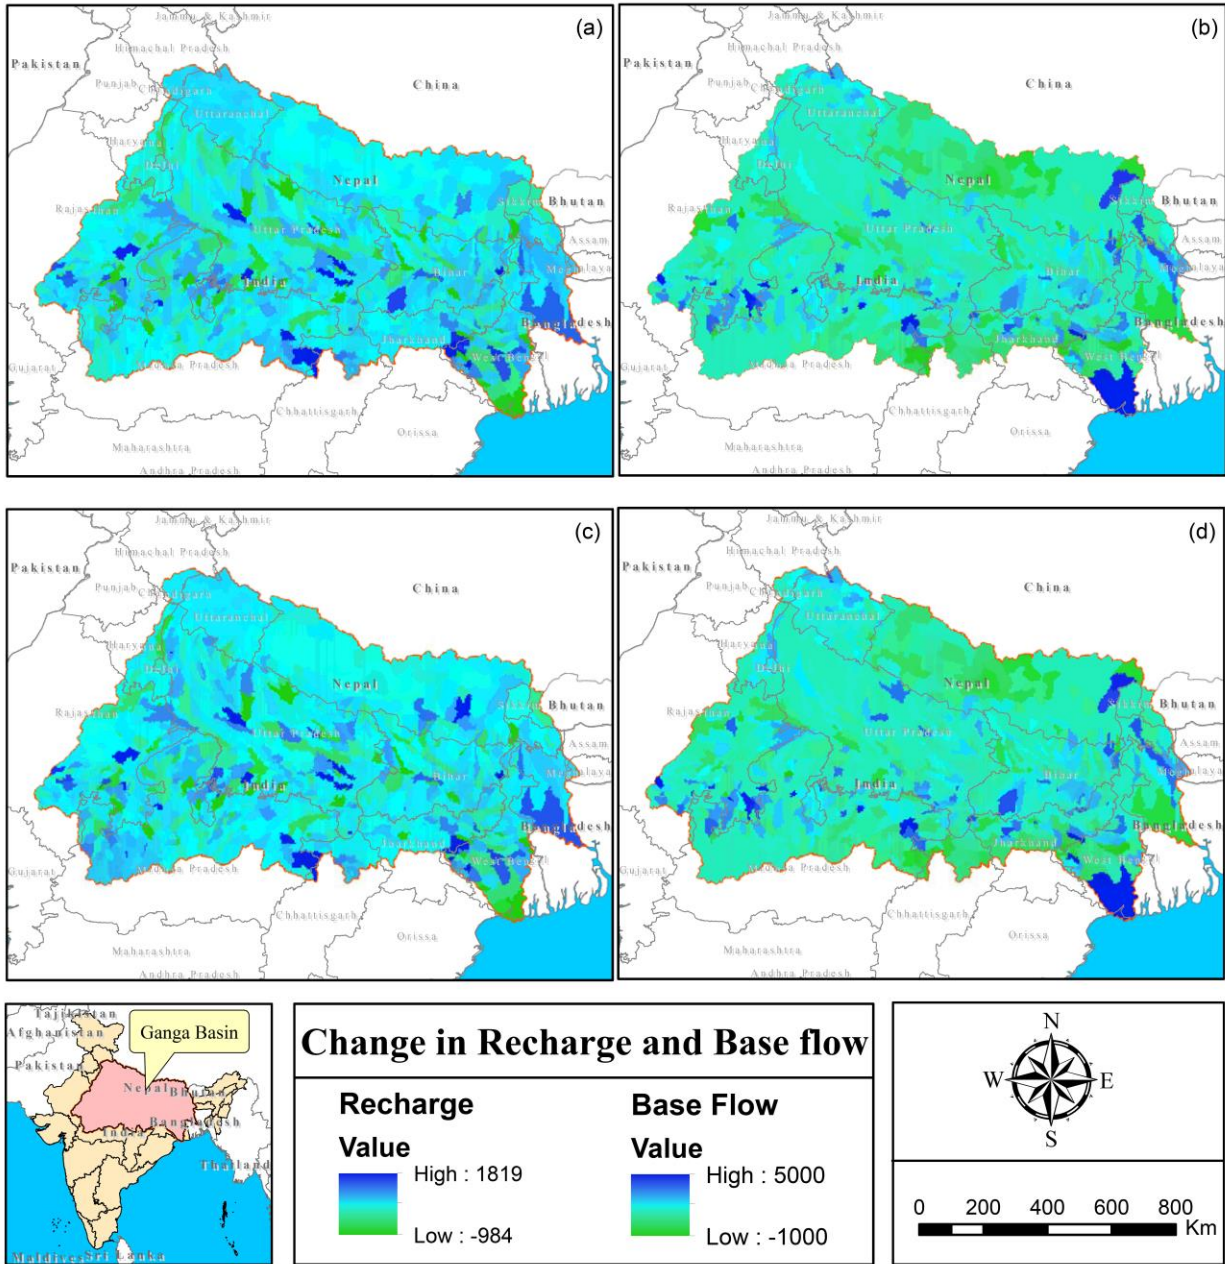

Fig. S2. Change in Recharge for the period (a) 2021-60 and (c) 2061-2100; and Base flow for the period (b) 2021-60 and (d) 2061-2100 in Ganga river basin projected by RCA4 (MIROC).

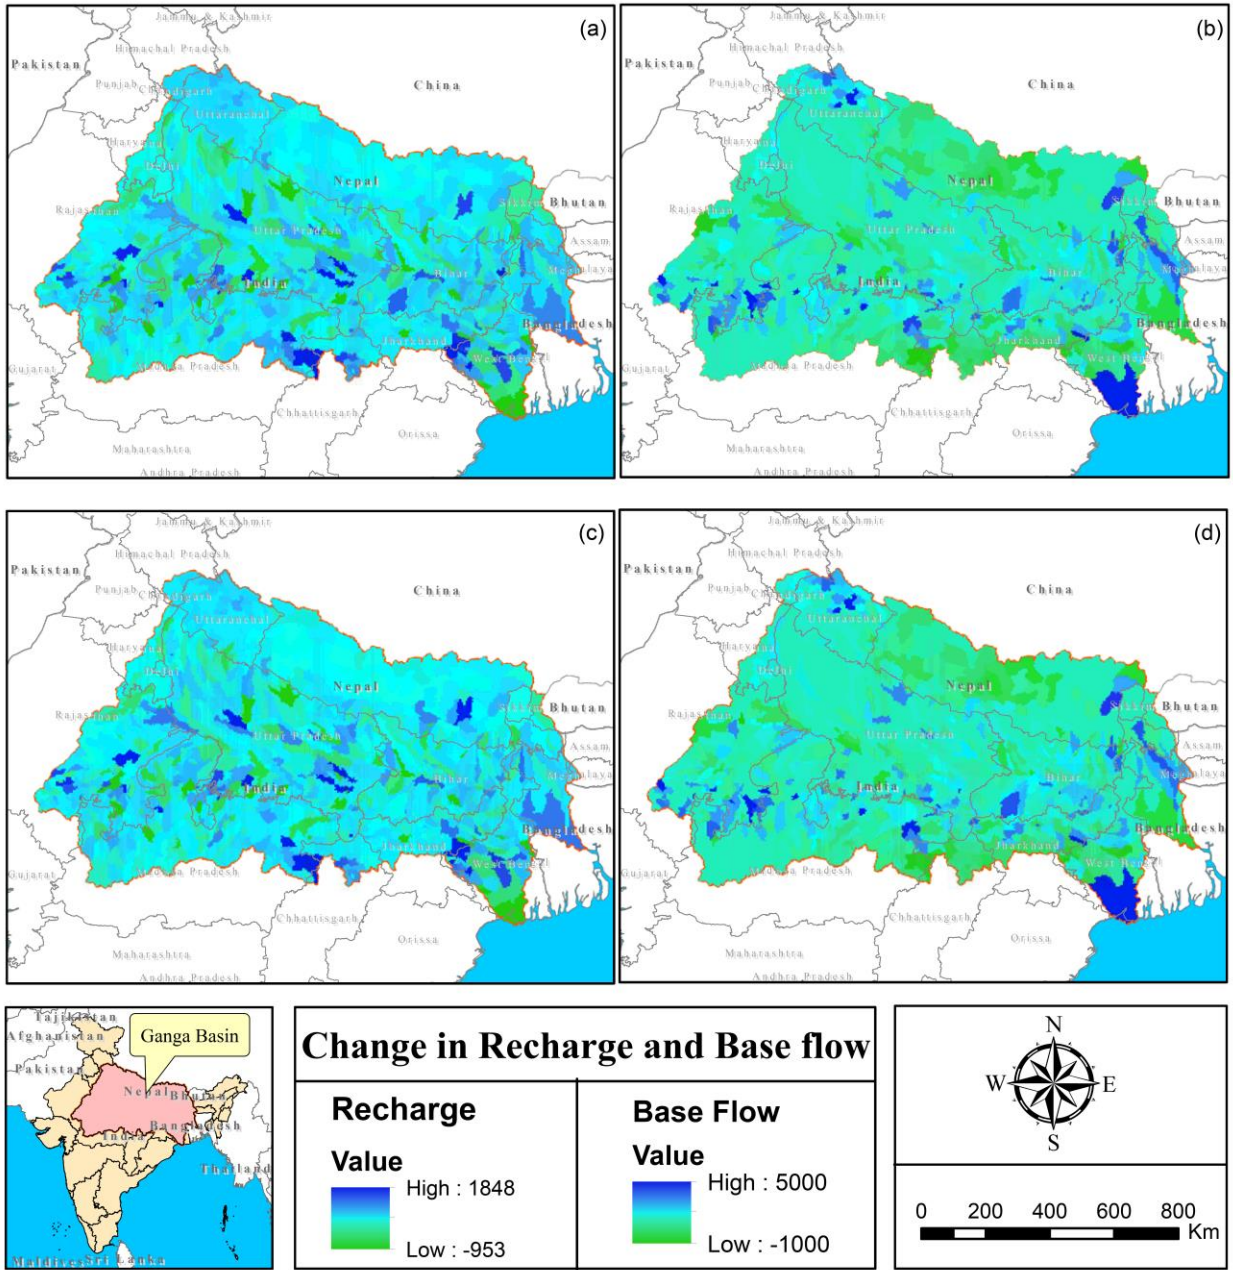

Fig. S3. Change in Recharge for the period (a) 2021-60 and (c) 2061-2100; and Base flow for the period (b) 2021-60 and (d) 2061-2100 in Ganga river basin projected by RCA4 (ICHEC).
