# Supplementary material for: Spatial Extent of Future Changes in the Hydrologic CycleComponents in Ganga Basin using Ranked CORDEX RCMs
Source: Copernicus journal article supplement (doi:10.5194/hess-2017-189), 2017-05-29
Supplement: Supplementary file [file hess-2017-189-AC1-supplement.pdf]

**Response to comments of Reviewers**

**Manuscript Number:**

**Title:** Spatial Extent of Future Changes in the Hydrologic Cycle Components in Ganga Basin using Ranked CORDEX RCMs

5 **Authors:** Jatin Anand, Manjula Devak, Ashvani Kumar Gosain, Rakesh Khosa and Dhanya C.T.

We would like to express our gratitude to the referees for constructive and helpful comments. We have revised the manuscript based on these comments and hope that the revised manuscript reads better and is acceptable. Our specific responses to the reviewer’s comments are given below.

10

**Response to Comments of Reviewer #1:**

**Comment:** The authors should justify why only climate change may play a major role in hydrology of the basin instead of changes in landuse/land cover, particularly in this largely irrigated areas with changing cropping patterns and rapid urbanization. What role does human water withdrawal play, and how are they accounting for that in their analysis?

15

**Response:** We agree with the reviewer’s comment on the combined impact (might be positive and negative) of landuse landcover (LULC), human interventions, climate change etc. in the hydrology of any basin. However, in this study, our focus was mainly on the effect of climate change on the basin hydrology, as highlighted in section 1, page 4 of the revised manuscript. The main objective of this paper is not about testing the combined effect of endogenous and exogenous changes over a catchment, but rather it is about understanding the effects of climate on hydrology, which is accomplished using a rigorously calibrated and validated hydrologic model over the basin (Anand, J., Gosain, A.K., Khosa, R., Srinivasan, R., 2017. Regional Scale Hydrologic Modeling for Prediction of Water Balance, Analysis of Trends in Streamflow and Variations in Streamflow: The case study of the Ganga River Basin. J. Hydrol. Reg. Stud.). Thus, in this study, we attempt to simulate the catchment’s response to mere changes in climate, while agreeing to the reality that the actual future response will vary, based on the local human activities including LULC changes. This is acknowledged in section 7, page 26 of the revised manuscript.

20

25

Though, our focus was on climate change aspects only, in this study, proper attention has been given to the source of irrigation, thus capturing the proper hydrology of the basin in the model, however. Moreover, in SWAT model, the domestic demand calculated based on the population for each region, is also incorporated, for simulating the realistic present scenario. Having said so, we agree that there would be considerable change in the irrigation areas, changes in irrigation methods and increase in the population which in turn increase the domestic water demand, in the future. These futuristic changes are not considered in the model, however, as have been attempted by other studies carried out in this context (Oguntunde and Abiodun, 2013; Troin et al., 2015).

30

35

The effect of LULC and human withdrawals, on the hydrology will be taken up as a future study, with carefully designed experiments. This is acknowledged in section 7, page 26 of the revised manuscript.

-----X-----X-----

40 **Comment:** The authors also present scenarios till 2100. Is it sensible at all to assume that the

LU/LC patterns, the vegetation patterns and the irrigation technologies will remain un-altered till 2100? If these processes have changed in the last 30 years, it is likely that they will change in the future as well.

**Response:** As mentioned earlier that the authors very much agree with the reviewer on this part. This comment is even applicable to the 21<sup>st</sup> century projections issued by IPCC through CMIP5 experiments, questioning the reliability of those projections, since those are also by assuming a few scenarios.

However, as mentioned earlier, our focus was to evaluate the spatio-temporal extent of the changes in the hydrology of the basin, due to the effect of plausible changes in the future climate only, as highlighted in section 1, page 4, line 11 in the revised manuscript.

The LULC patterns, the vegetation patterns and the irrigation technologies will certainly change in the future. Along with reiterating the fact that these were not the focus in the present study, the inclusion of all these factors in one model for a huge basin of spatial extent about  $1.08 \times 10^6 \text{ km}^2$ , along with the expected spatio-temporal heterogeneity, to simulate the catchment's response in future, is a herculean task which will carry great amount of uncertainty. We anticipate that instead of including all these factors together, the individual effect of factors might be more helpful to appreciate the possible adverse effect of these individual factors.

In addition, since LU/LC is an important input parameter, we have tried to capture the present LULC condition in the current model at a very fine level. All the landuse pattern, along with the cropping pattern and source of irrigation are included. Further, the landuse layers were kept constant, to analyse the possible impact of climate change in the spatio-temporal changes in the hydrological variables. The individual and combined effect of these factors will be taken up as a future study, on the same basin.

-----X-----X-----

**Comment:** Next, why SWAT? Why not others? And why RCP4.5?

**Response:** As rightly mentioned by the reviewer, a wide range of hydrological models are available (e.g., SWAT, VIC, TOPMODEL etc.). However, SWAT is deployed in the present study, due to its widely-known versatility. Arnold et al. (1999) in his study used SWAT model to simulate the entire U.S.A. for river discharges at around 6000 gauging stations. Gosain et al., (2006) modeled twelve large river catchments in India with the purpose of quantifying the climate change impact on hydrology. Faramarzi et al., (2013) used the African model to study the impact of climate change in Africa. Abbaspour et al., (2015) simulated hydrology and water quality for entire Europe. Also, the larger capacity of ArcGIS now allows building finer resolution large-scale models, which could be calibrated using powerful parallel processing (Rouholahnejad et al., 2012). It includes a snow module, permitting the delimitation of up to ten elevation bands with associated precipitation and temperature lapse rates (Fontaine et al., 2002; Rahman et al., 2013). Also, SWAT allows users to define simulation of irrigation water on cropland on the basis of five alternative sources: stream reach, reservoir, shallow aquifer, deep aquifer, or a water body source external to the watershed (Gassman et al., 2007). In addition to it, SWAT provide the users Reservoir operation and inclusion of domestic water demands, which other models lack. Furthermore, SWAT allows the users to limit the size of catchment based on the gauge and reservoir sites, which the other grid based models lack

and is an important factor considering the size of the basin. The wide range of SWAT applications, underscores that the model is a very flexible and robust tool that can be used to simulate a variety of watershed problems. Moreover, the process of developing SWAT model for a given watershed has also been significantly facilitated by the development of GIS-based interfaces, which provide a direct means of translating digital topographic, land use, and soil data into model inputs. Also, it is an open source code which ensures the improvement in the simulation accuracy of key processes.

**Manuscript is revised by adding the following lines. Vide Pg. 7, lines 11-18 of the revised manuscript.**

*“SWAT has inbuilt snow module to capture and simulate snowmelt hydrology, permitting the delimitation of up to ten elevation bands with associated precipitation and temperature lapse rates (Fontaine et al., 2002; Rahman et al., 2013). In addition, SWAT allows users to add lapse rate for both precipitation (PLAPS) and temperature (TLAPS) which is very essential in the study region considered. In this study, sub-basin has been divided into ten elevation bands. Furthermore, in SWAT the date and net volume of irrigation water can be set according to the actual condition along with the irrigation water source (surface rivers, reservoirs or groundwater, etc). Also, the domestic, ecological and industrial water in the model can be added in the model as “consumptive use water”.”*

In the IPCC 4th Assessment Report, the emission scenarios were fabricated in view of the storylines that were gathered into an all the more financially concerned advancement or a more ecological and sustainable advancement, and into a more globalized world or an all the more regionally developing world. While, In the IPCC 5th Assessment Report, the scenarios are based on total anthropogenic radiative forcings towards the end of the 21st century. Economic models can take diverse ways to achieve distinctive radiative forcings that are equivalent to distinctive concentration paths of the greenhouse gases, the so-called Representative Concentration Pathway scenarios (RCPs). The different scenarios are marked as: RCP 8.5, RCP 4.5 and RCP 2.6, which correspond to radiative forcings of  $8.5 \text{ Wm}^{-2}$ ,  $4.5 \text{ Wm}^{-2}$ , and  $2.6 \text{ Wm}^{-2}$ , respectively. The first RCP is the most skeptical and results in a worldwide warming towards the end of the 21st century of about  $4^\circ\text{C}$ , whereas the last RCP is the most optimistic and corresponds to a global warming of about  $1^\circ\text{C}$ . Then again, RCP 4.5 can be reasoned as neither extreme (RCP 8.5), nor mild (RCP 2.5); but the moderate degree scenario, which can be helpful in capturing the average response of the catchment. The RCP 4.5 resembles around to B1 scenario in IPCC 4th Assessment Report, the radiative forcing increases almost linearly up to about the year 2060 and then slows down the increase rate until the end of the century where it stabilizes. Moreover, the forcing pathway of the RCP4.5 scenario is similar to a several climate policy situations and numerous low-emissions reference conditions, such as the SRES B1 scenario. In this work, the results are shown for RCP 4.5 scenario. However, the validated model may be run for other scenarios also, and can be included.

**Manuscript is revised by adding the following lines. Vide Pg. 6, lines 8-26 of the revised manuscript.**

*“In the IPCC 4th Assessment Report, the emission scenarios were fabricated in view of the storylines that were gathered into an all the more financially concerned advancement or a more ecological and sustainable advancement, and into a more globalized world or an all the more regionally developing world. While, In the IPCC 5th Assessment Report, the scenarios are based on total anthropogenic radiative forcings towards the end of the 21st century. Economic models can take diverse ways to achieve distinctive radiative forcings that are*

equivalent to distinctive concentration paths of the greenhouse gases, the so-called Representative Concentration Pathway scenarios (RCPs). The different scenarios are marked as: RCP 8.5, RCP 4.5 and RCP 2.6, which correspond to radiative forcings of  $8.5 \text{ Wm}^{-2}$ ,  $4.5 \text{ Wm}^{-2}$ , and  $2.6 \text{ Wm}^{-2}$ , respectively. The first RCP is the most skeptical and results in a worldwide warming towards the end of the 21st century of about  $4^\circ\text{C}$ , whereas the last RCP is the most optimistic and corresponds to a global warming of about  $1^\circ\text{C}$ . Then again, RCP 4.5 can be reasoned as neither extreme (RCP 8.5), nor mild (RCP 2.5); but the moderate degree scenario, which can be helpful in capturing the average response of the catchment. The RCP 4.5 resembles around to B1 scenario in IPCC 4th Assessment Report, the radiative forcing increases almost linearly up to about the year 2060 and then slows down the increase rate until the end of the century where it stabilizes. Apparently, RCP 4.5 is a stabilization scenario in which total radiative forcing is stabilized just after 2100, without exceeding the long-run radiative forcing target level. Moreover, the forcing pathway of the RCP4.5 scenario is similar to a several climate policy situations and numerous low-emissions reference conditions, such as the SRES B1 scenario (Wise et al., 2009). Thus, in this study, RCP 4.5 scenario is adopted to study the impact of climate change on the different hydrologic components and the results are shown for the same.”

-----X-----X-----

**Comment:** Have the authors used any snow module in SWAT?

**Response:** SWAT has inbuilt snow module to capture and simulate snowmelt hydrology. SWAT model allows the users to split the sub-basin into elevation bands. In this study, we have divided the sub-basin into ten elevation bands. In addition, SWAT also allows users to add lapse rate for both precipitation (PLAPS) and temperature (TLAPS) which is very essential in the study region considered.

In the present work, the emphasis has been given to the snowmelt hydrology of the basin, which was missing in most of the earlier studies (Chawla and Mujumdar, 2015; Kothyari et al., 1997). We have used PLAPS and TLAPS based on rigorous calibration and validation to capture the snowmelt hydrology of high altitude areas, and comparison of observed and simulated runoffs do provide sufficient evidence that the model was able to capture the inherent snowmelt hydrology of the region quite well. Furthermore, segregation of the percentage change in contribution of snow melt runoff from the total streamflow is done in the present work which was missing in the earlier studies (Chawla and Mujumdar, 2015; Kothyari et al., 1997) (Fig 1 in the supplementary material).

**Manuscript is revised by adding the following lines. Vide Pg. 7, lines 11-18 of the revised manuscript.**

“SWAT has inbuilt snow module to capture and simulate snowmelt hydrology, permitting the delimitation of up to ten elevation bands with associated precipitation and temperature lapse rates (Fontaine et al., 2002; Rahman et al., 2013). In addition, SWAT allows users to add lapse rate for both precipitation (PLAPS) and temperature (TLAPS) which is very essential in the study region considered. In this study, sub-basin has been divided into ten elevation bands. Furthermore, in SWAT the date and net volume of irrigation water can be set according to the actual condition along with the irrigation water source (surface rivers, reservoirs or groundwater, etc). Also, the domestic, ecological and industrial water in the model can be added in the model as “consumptive use water”.”

**Comment:** What about groundwater? What is its relative contribution to low flows?

5 **Response:** Calculations has been done to find out the contribution of groundwater to stream lows. Results pertaining to the quantitative assessment of the contribution of climate change to the groundwater and base flow are provided in Section 6.4 (Pg. 24) and Figure 12 of the HESS paper and Figure S2 and S3 of supplementary material.

10 It is said in the manuscript that the base flow in the future would change in the range from +5000 to –1000 mm (+ 100% to -500%) (Section 6.4, Pg. 24, line 8).

Also, results pertaining to the quantitative assessment of the different hydrologic components for different tributaries of Ganga basin has been added in Section 6.4 (Pg. 26)

**Manuscript is revised by adding the following lines. Vide Pg. 26, lines 4-11 of the revised manuscript.**

15  
 20  
 25  
 30  
 35  
 40  
 45  
 50  
 55  
 60  
 65  
 70  
 75  
 80  
 85  
 90  
 95  
 100  
 105  
 110  
 115  
 120  
 125  
 130  
 135  
 140  
 145  
 150  
 155  
 160  
 165  
 170  
 175  
 180  
 185  
 190  
 195  
 200  
 205  
 210  
 215  
 220  
 225  
 230  
 235  
 240  
 245  
 250  
 255  
 260  
 265  
 270  
 275  
 280  
 285  
 290  
 295  
 300  
 305  
 310  
 315  
 320  
 325  
 330  
 335  
 340  
 345  
 350  
 355  
 360  
 365  
 370  
 375  
 380  
 385  
 390  
 395  
 400  
 405  
 410  
 415  
 420  
 425  
 430  
 435  
 440  
 445  
 450  
 455  
 460  
 465  
 470  
 475  
 480  
 485  
 490  
 495  
 500  
 505  
 510  
 515  
 520  
 525  
 530  
 535  
 540  
 545  
 550

“Apparently, in order to tackle the water management issues proficiently, it is important to quantify and analyze the different hydrologic components within the basin for different system. Water balance is an important component in SWAT model as it involves all the processes happening within the watershed area (Fletcher et al., 2013; Shawul et al., 2013). The analysis of the results projected by RCA4 (CNRM-CERFACS) for the different systems of Ganga river basin shows that the water yield and evapotranspiration have major shares in the water balance (Figure 13). Further examination of results reveals that the Upper Ganga River System (Upstream of Allahabad) largely contribute to the water yield in the catchment while Chambal and Sindh river systems have lowest contribution in the total water yield (Figure 13).”

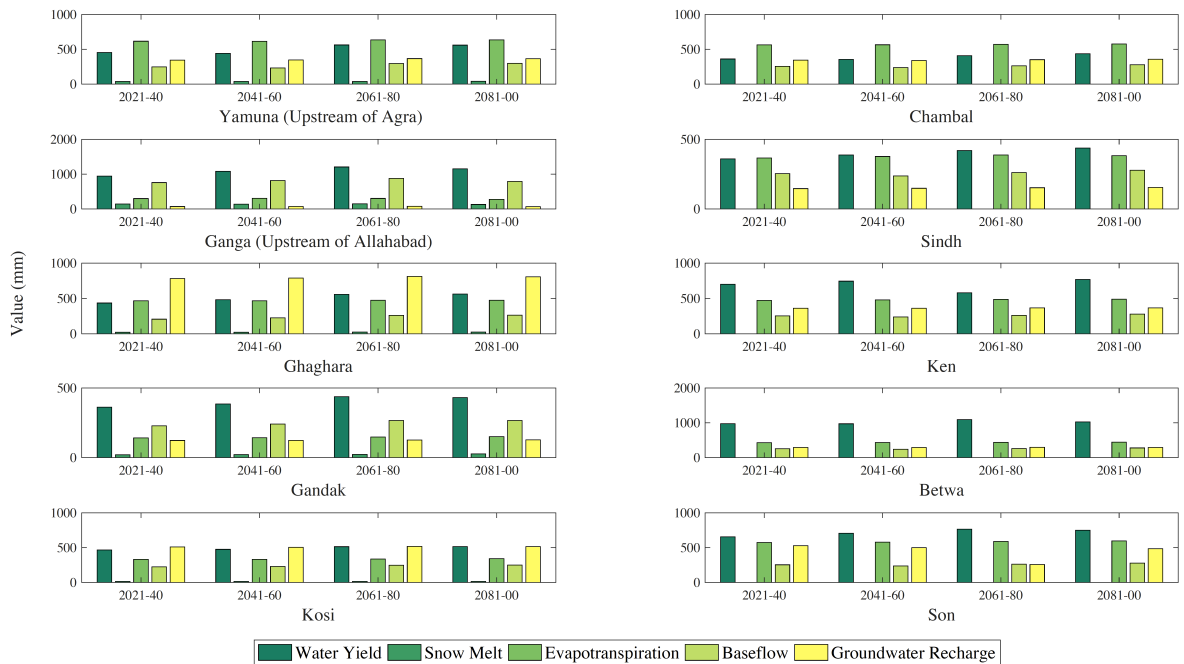

Figure 13. Annual water balance components for major tributaries of the Ganga river basin projected by RCA4 (CNRM-CERFACS)

5

-----X-----X-----

**Comment:** If more precipitation falls as rain and less as snow (as expected from global warming), this translates into an increase of winter discharge and an increase in recharge and base flows, but the paper reports otherwise (para 15).

**Response:** As mentioned by the reviewer that there could be an increase in the winter discharge. Please note that this **is in accordance with our finding** (Figure 7, Pg. 19 in main manuscript and Figure 1 in Supplementary material). Recharge is found to be increasing, in the northern part of the basin. Only the central part of the basin and highly irrigated areas of north-western parts have shown major reduction in the recharge and base flow (Figure 12, Pg. 24 in main manuscript and Figure 2 in Supplementary material). Water resources are synchronous with rainfall. Under natural conditions, long-term trends of groundwater recharge, is a function of total precipitation, temperature and evapotranspiration. A combination of reduced precipitation and increased temperature can have an adverse impact on recharge within the entire basin, whereas a combination of increased precipitation and decreased temperature leads to an increase in recharge. Variations in temperature can alter evapotranspiration rate, which indirectly affects the amount of groundwater recharge. Thus, temperature change impacts are more important in areas where evapotranspiration is an important part of the hydrologic cycle. The analysis of precipitation in the Ganga River Basin showed a decreasing trend in Yamuna basin, central portion of Ganga, Chambal and Sindh basin. However, analysis of temperature time series revealed that the temperature exhibited increasing trends during the study period. The results suggest that possible future climatic conditions would have a negative impact on recharge within north-western parts of Ganga River Basin and part of central basin. not in the south-western part, where a combination of reduced precipitation and increased temperature has negative impact on recharge and evapotranspiration increases. We tried to highlight that the central part of the basin has undergone major loss in recharge and baseflow, as the majority of the population is resided in this area and is the main consumer of the maximum available water and any change in the availability of water is going to change the dynamics of the hydrology in this area in a very severe way.

-----X-----X-----

**Comment:** The locations considered in this analysis (for example, Rishikesh) are not regions of permanent snowpack.

**Response:** As rightly pointed out by the reviewer, Rishikesh might not be the snowpack region. However, its hydrology is highly affected by the upstream areas, which are dominant with snow and glacier and Ganga itself

originates from this area. In the present study, Rishikesh station was chosen, because of the availability of historical data at this location.

**Manuscript is revised by adding the following lines. Vide Pg. 22, lines 7-9 of the revised manuscript.**

“Snow accumulation and snowmelt processes are dominant process in the upstream portion of Rishikesh, where snowmelt driven flow provides most of the surface water during non-monsoon season.”

-----X-----X-----

**Comment:** Not clear why the authors chose RCP4.5.

10 **Response:** In the IPCC 4th Assessment Report, the emission scenarios were fabricated in view of the storylines that were gathered into an all the more financially concerned advancement or a more ecological and sustainable advancement, and into a more globalized world or an all the more regionally developing world. While, In the IPCC 5th Assessment Report, the scenarios are based on total anthropogenic radiative forcings towards the end of the 21st century. Economic models can take diverse ways to achieve distinctive radiative forcings that are  
15 equivalent to distinctive concentration paths of the greenhouse gases, the so-called Representative Concentration Pathway scenarios (RCPs). The different scenarios are marked as: RCP 8.5, RCP 4.5 and RCP 2.6, which correspond to radiative forcings of  $8.5 \text{ Wm}^{-2}$ ,  $4.5 \text{ Wm}^{-2}$ , and  $2.6 \text{ Wm}^{-2}$ , respectively. The first RCP is the most skeptical and results in a worldwide warming towards the end of the 21st century of about  $4^\circ\text{C}$ , whereas the last RCP is the most optimistic and corresponds to a global warming of about  $1^\circ\text{C}$ . Then again, RCP 4.5 can be  
20 reasoned as neither extreme (RCP 8.5), nor mild (RCP 2.5); but the moderate degree scenario, which can be helpful in capturing the average response of the catchment. The RCP 4.5 resembles around to B1 scenario in IPCC 4th Assessment Report, the radiative forcing increases almost linearly up to about the year 2060 and then slows down the increase rate until the end of the century where it stabilizes. Moreover, the forcing pathway of the RCP4.5 scenario is similar to a several climate policy situations and numerous low-emissions reference  
25 conditions, such as the SRES B1 scenario. In this work, the results are shown for RCP 4.5 scenario. However, the validated model may be run for other scenarios also, and can be included.

**Manuscript is revised by adding the following lines. Vide Pg. 6, lines 8-26 of the revised manuscript.**

30 “In the IPCC 4th Assessment Report, the emission scenarios were fabricated in view of the storylines that were gathered into an all the more financially concerned advancement or a more ecological and sustainable advancement, and into a more globalized world or an all the more regionally developing world. While, In the IPCC 5th Assessment Report, the scenarios are based on total anthropogenic radiative forcings towards the end of the 21st century. Economic models can take diverse ways to achieve distinctive radiative forcings that are  
35 equivalent to distinctive concentration paths of the greenhouse gases, the so-called Representative Concentration Pathway scenarios (RCPs). The different scenarios are marked as: RCP 8.5, RCP 4.5 and RCP 2.6, which correspond to radiative forcings of  $8.5 \text{ Wm}^{-2}$ ,  $4.5 \text{ Wm}^{-2}$ , and  $2.6 \text{ Wm}^{-2}$ , respectively. The first RCP is the most skeptical and results in a worldwide warming towards the end of the 21st century of about  $4^\circ\text{C}$ , whereas the last RCP is the most optimistic and corresponds to a global warming of about  $1^\circ\text{C}$ . Then again, RCP 4.5 can be  
40 reasoned as neither extreme (RCP 8.5), nor mild (RCP 2.5); but the moderate degree scenario, which can be

helpful in capturing the average response of the catchment. The RCP 4.5 resembles around to B1 scenario in IPCC 4th Assessment Report, the radiative forcing increases almost linearly up to about the year 2060 and then slows down the increase rate until the end of the century where it stabilizes. Apparently, RCP 4.5 is a stabilization scenario in which total radiative forcing is stabilized just after 2100, without exceeding the long-run radiative forcing target level. Moreover, the forcing pathway of the RCP4.5 scenario is similar to a several climate policy situations and numerous low-emissions reference conditions, such as the SRES B1 scenario (Wise et al., 2009). Thus, in this study, RCP 4.5 scenario is adopted to study the impact of climate change on the different hydrologic components and the results are shown for the same.”

10 -----X-----X-----

**Comment:** Firstly, the authors’ evaluation of the RCMs on simulated runoff might be contaminated by performance of the SWAT model in differing precipitation ranges; therefore, they should be evaluated on a variable that they simulate, namely, precipitation.

15  
**Response:** We beg to disagree with the reviewer. Please note that SWAT model was rigorously calibrated and validated for the entire basin, using the observed precipitation data from Indian Meteorological Department (IMD) data, as explained in section 6.1, Pg. 12. SWAT model developed for Ganga river basin is calibrated manually by following a systematic approach (Arnold et al., 2012). At first, upstream gauge is calibrated and the parameters corresponding to that gauge site are kept constant while the parameters of the sub-basins between upstream gauge and the next downstream gauge site is calibrated. The same approach was repeated for the next downstream stations till we reach the outlet of the catchment (Farakka). Once the model has been established competent enough to mimic the hydrology of the entire basin, then it is simulated using the outputs from different RCMs, using same set of calibrated parameters. Here, we tried to establish which RCM performed better in mimicking the hydrology of the basin (surface runoff in this case – the only observed variable). The comparison with respect to observed runoff, however, indirectly take into account the precipitation characteristics also, since all the other parameters used in the model are same.

**Manuscript is revised by adding the following lines. Vide Pg. 12, lines 7-13 of the revised manuscript.**

30 “SWAT model developed for Ganga river basin is calibrated manually by following a systematic approach (Arnold et al., 2012). At first, upstream gauge is calibrated and the parameters corresponding to that gauge site are kept constant while the parameters of the sub-basins between upstream gauge and the next downstream gauge site is calibrated. The same approach was repeated for the next downstream stations till we reach the outlet of the catchment (Farakka). Once the model has been established competent enough to mimic the hydrology of the entire basin, then it is simulated using the outputs from different RCMs, using same set of calibrated parameters.”

**Manuscript is revised by adding the following lines. Vide Pg. 16, lines 6-9 of the revised manuscript.**

“The ranking of RCMs is done to establish, which RCM performed better in mimicking the hydrology of the basin (surface runoff in this case – the only observed variable). The comparison with respect to observed runoff,



however, indirectly take into account the precipitation characteristics also, since all the other parameters used in the model are same.”

-----X-----X-----

5

**Comment:** More importantly, why do these three models rank better than the others? Are they permitting more physical processes (such as convection?) or are their parameterizations any different than the rest?

10

**Response:** Regional climate modeling was developed based on a dynamic formulation using the initial and time-dependent lateral boundary conditions of GCMs to deliver higher resolution outputs. Due to their dedicated physics adapted to this resolution RCMs can improve some important aspects of the physical processes governing regional climate variability in precipitation and temperature, especially over watersheds located in complex topography (Troin et al., 2014 and Diffenbaugh et al., 2005). So, in a nutshell we can say that the RCMs which performed comparatively better than the other RCMs must have boundary condition and physics close to the prevailing condition. However, analysis of RCM parametrizations is beyond the scope of this study.

15

-----X-----X-----

20

**Comment:** It may be worthwhile to examine whether such changes are actually statistically significant as compared to the observational record.

25

**Response:** Based on the trend analysis done by the authors for the previous studies, the analysis provides a strong indication that both climate change and anthropogenic influences have altered the water balance in the Ganga basin. It is well known that climate change can alter the hydrologic systems, especially glacier and snow melt. Thus, the increase in snow and glacier melt process may probably can cause an increase in the annual surface runoff. As a result, an increasing trend in surface runoff is observed (Figure Below). Whereas, rapid increase of settlement area, increased irrigation etc. in downstream areas and non-perennial regions have shown decreasing trend (Figure Below).

30

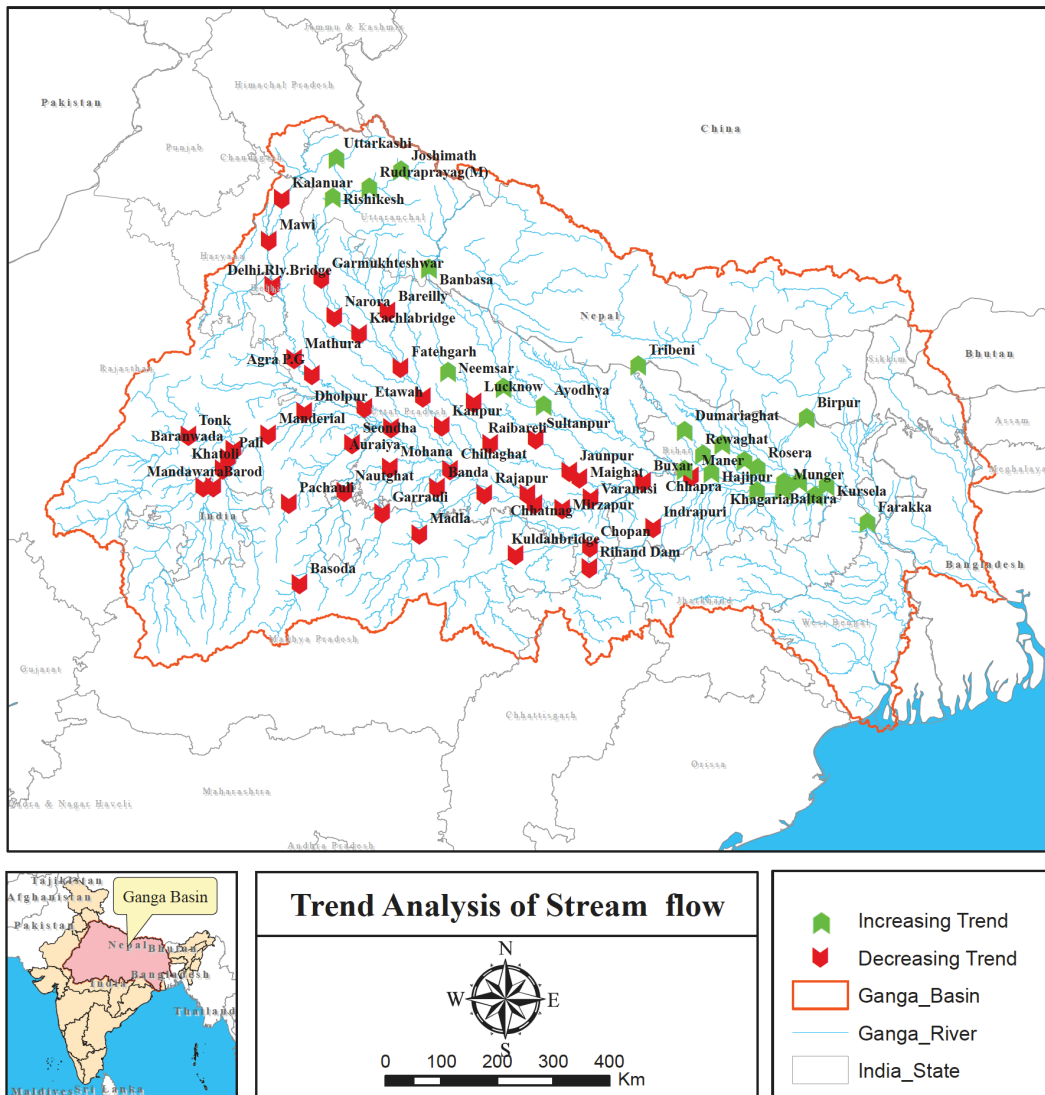

Figure. Trend Analysis for Various Stream Gauge Stations for Ganga river basin.

5

**Comment:** Finally, the performance of the CORDEX RCMs in simulating the Indian monsoon is not known to be satisfactory.

**Response:** The NSE ranges from  $-\infty$  to 1 and measures how well the simulated versus observed data match the 1:1 line (Moriasi et al., 2007). Also, NSE is highly sensitive to the peaks (in our case monsoon flow). The analysis of the NSE values for top three ranked RCMs is greater than 0.80 (Pg. 15, Table 4), which falls in **excellent** range and shows that the RCMs are able to capture the high flows quite well in our case while, RCA4 (ICHEC) has NSE of 0.93. And except few RCMs all the others have NSE values greater than 0.7. So, we can say that performance of CORDEX RCMs in simulating Indian Monsoon is good.

15 A comparison has been made to average annual monthly surface runoff generated by ranked RCMs and observed surface runoff. Since, the time series data can't be given, hence average annual monthly surface runoff is plotted

to showcase the efficacy of the RCMs in simulating Indian Monsoon. The results show that the RCMs has been able to simulate monsoon season appreciably.

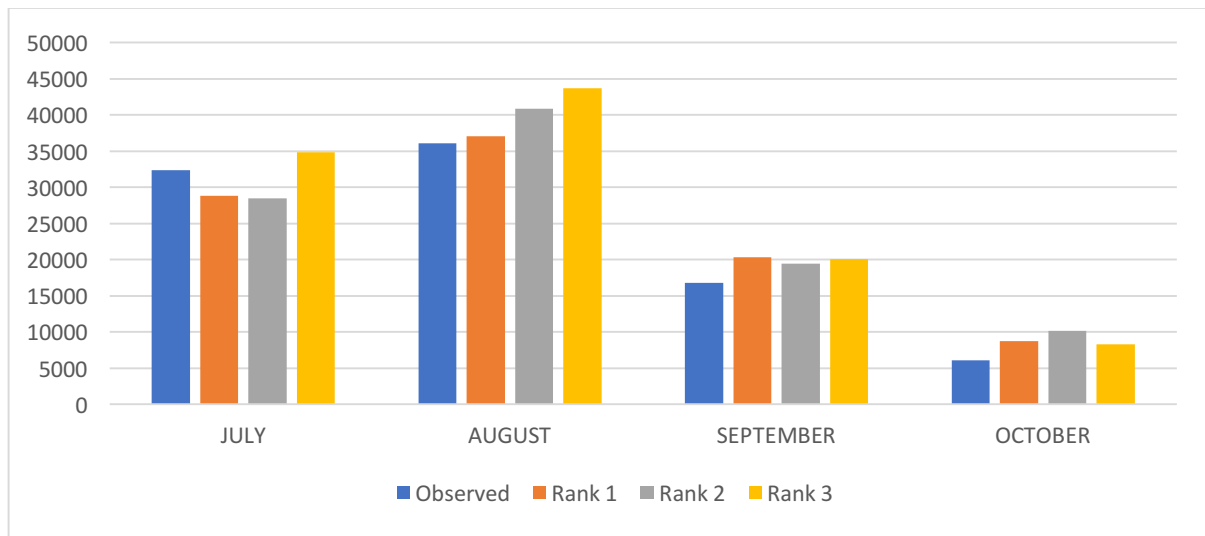

5 Figure. Comparison of annual Monthly Observed and Simulated Discharge (1990-2004)

-----X-----X-----

**Comment:** What drainage data has been used for SWAT?

10 **Response:** In this study, surface runoff data used for the calibration and comparison purpose is provided by Central Water Commission (CWC), Ministry of Water Resources, India. This is explained in Pg. 5 line 11 – 13.

-----X-----X-----

15 **Comment:** Is the calibration and validation of SWAT done with monthly data? How do the authors make inferences on extremes with monthly data?

**Response:** The calibration and validation of SWAT model was done using monthly data. SWAT allows the users to run the model on daily, monthly and yearly basis. Once the model was calibrated and validated on the monthly basis, it can be used to simulate daily flows for the same set of parameters. The simulated daily flows can be used to make analyse extremes.

-----X-----X-----

25 **References**

Abbaspour, K. C., Rouholahnejad, E., Vaghefi, S., Srinivasan, R., Yang, H. and Kløve, B.: A continental-scale hydrology and water quality model for Europe: Calibration and uncertainty of a high-resolution large-scale SWAT model, *J. Hydrol.*, 524, 733–752, doi:10.1016/j.jhydrol.2015.03.027, 2015.

Arnold, J. G., Moriasi, D. N., Gassman, P. W., Abbaspour, K. C., White, M. J., Srinivasan, R., Santhi, C., Harmel,

- R. D., Griensven, A. Van, VanLiew, M. W., Kannan, N. and Jha, M. K.: Swat: Model Use, Calibration, and Validation, *Am. Soc. Agric. Biol. Eng.*, 55(4), 1491–1508, 2012.
- Chawla, I. and Mujumdar, P. P.: Isolating the impacts of land use and climate change on streamflow, *Hydrol. Earth Syst. Sci.*, 19(8), 3633–3651, doi:10.5194/hess-19-3633-2015, 2015.
- 5 Faramarzi, M., Abbaspour, K. C., Ashraf Vaghefi, S., Farzaneh, M. R., Zehnder, A. J. B., Srinivasan, R. and Yang, H.: Modeling impacts of climate change on freshwater availability in Africa, *J. Hydrol.*, 480, 85–101, doi:10.1016/j.jhydrol.2012.12.016, 2013.
- Fontaine, T. A., Cruickshank, T. S., Arnold, J. G. and Hotchkiss, R. H.: Development of a snowfall–snowmelt routine for mountainous terrain for the soil water assessment tool (SWAT), *J. Hydrol.*, 262(1–4), 209–223, doi:10.1016/S0022-1694(02)00029-X, 2002.
- 10 Gassman, P. W., Reyes, M. R., Green, C. H. and Arnold, J. G.: The soil and water assessment tool: Historical development, applications, and future research directions, *Trans. Asabe*, 50(4), 1211–1250, doi:10.1.1.88.6554, 2007.
- Gosain, A. K., Rao, S. and Basuray, D.: Climate change impact assessment on hydrology of Indian river basins, *Current*, 90(3), 346–353 [online] Available from: <http://www.ias.ac.in/currsci/feb102006/346.pdf>, 2006.
- 15 Kothiyari, U. C., Singh, V. P. and Aravamuthan, V.: An Investigation of Changes in Rainfall and Temperature Regimes of the Ganga Basin in India, 1997.
- Oguntunde, P. G. and Abiodun, B. J.: The impact of climate change on the Niger River Basin hydroclimatology, West Africa, *Clim. Dyn.*, 40(1–2), 81–94, doi:10.1007/s00382-012-1498-6, 2013.
- 20 Rahman, K., Maringanti, C., Beniston, M., Widmer, F., Abbaspour, K. and Lehmann, A.: Streamflow Modeling in a Highly Managed Mountainous Glacier Watershed Using SWAT: The Upper Rhone River Watershed Case in Switzerland, *Water Resour. Manag.*, 27(2), 323–339, doi:10.1007/s11269-012-0188-9, 2013.
- Rouholahnejad, E., Abbaspour, K. C., Vejdani, M., Srinivasan, R., Schulin, R. and Lehmann, A.: A parallelization framework for calibration of hydrological models, *Environ. Model. Softw.*, 31, 28–36, doi:10.1016/j.envsoft.2011.12.001, 2012.
- 25 Troin, M., Velázquez, J. A., Caya, D. and Brissette, F.: Comparing statistical post-processing of regional and global climate scenarios for hydrological impacts assessment: A case study of two Canadian catchments, *J. Hydrol.*, 520, 268–288, doi:10.1016/j.jhydrol.2014.11.047, 2015.
- Wise, M., Calvin, K., Thomson, A., Clarke, L., Bond-Lamberty, B., Sands, R., Smith, S. J., Janetos, A. and Edmonds, J.: Implications of limiting CO<sub>2</sub> concentrations for land use and energy., *Science*, 324(5931), 1183–6, doi:10.1126/science.1168475, 2009.
- 30
